# Supplementary material for: Insomnia Interventions in the Workplace: A Systematic Review and Meta-Analysis
Source: PubMed Central journal article supplement (PMC7504457; doi:10.3390/ijerph17176401), 2020-09-02
Supplement: ijerph-17-06401-s001.pdf [file ijerph-17-06401-s001.pdf]

Supplementary Materials:

Table S1. Search strategy

| Database       | Search Strategy                                                                                                                                                                                                                                                                                                                                |
|----------------|------------------------------------------------------------------------------------------------------------------------------------------------------------------------------------------------------------------------------------------------------------------------------------------------------------------------------------------------|
| PubMed         | (((((“sleep initiation and maintenance disorders”[MeSH Terms]) OR (((“sleep”[All Fields] AND “initiation”[All Fields]) AND “maintenance”[All Fields]) AND “disorders”[All Fields])) OR “sleep initiation and maintenance disorders”[All Fields]) OR “insomnia”[All Fields]) OR “insomnias”[All Fields]) AND “occupational health”[All Fields]) |
| SCOPUS         | (TITLE-ABS-KEY (insomnia) AND TITLE-ABS-KEY (“occupational health”))                                                                                                                                                                                                                                                                           |
| CINAHL         | (insomnia AND “occupational health”)                                                                                                                                                                                                                                                                                                           |
| Web of Science | TS= (insomnia AND “occupational health”)                                                                                                                                                                                                                                                                                                       |
| PsycINFO       | Insomnia AND “occupational health”                                                                                                                                                                                                                                                                                                             |

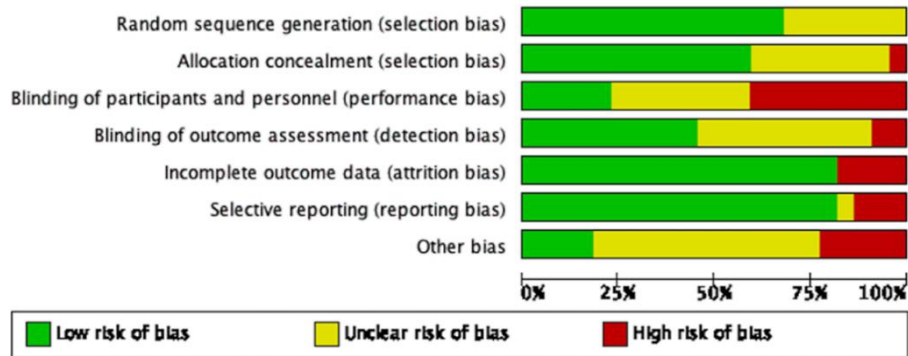

Figure S2. Risk of bias graph: review authors' judgements about each risk of bias item presented as percentages across all included studies.

|                           | Random sequence generation (selection bias) | Allocation concealment (selection bias) | Blinding of participants and personnel (performance bias) | Blinding of outcome assessment (detection bias) | Incomplete outcome data (attrition bias) | Selective reporting (reporting bias) | Other bias |
|---------------------------|---------------------------------------------|-----------------------------------------|-----------------------------------------------------------|-------------------------------------------------|------------------------------------------|--------------------------------------|------------|
| Bostock (2016)            | ?                                           | ?                                       | +                                                         | +                                               | +                                        | +                                    | ?          |
| Crain (2017)              | ?                                           | ?                                       | +                                                         | +                                               | +                                        | +                                    | ?          |
| Dalgaard (2014)           | +                                           | +                                       | +                                                         | ?                                               | +                                        | +                                    | +          |
| Ebert (2015)              | +                                           | +                                       | +                                                         | ?                                               | +                                        | +                                    | ?          |
| Ebert (2016) <sup>2</sup> | +                                           | ?                                       | +                                                         | +                                               | +                                        | +                                    | +          |
| Ebert (2016) <sup>3</sup> | +                                           | +                                       | +                                                         | +                                               | +                                        | +                                    | +          |
| Genin (2017)              | ?                                           | ?                                       | ?                                                         | ?                                               | +                                        | +                                    | ?          |
| Germain (2014)            | +                                           | +                                       | +                                                         | ?                                               | +                                        | +                                    | ?          |
| Heber (2016)              | +                                           | +                                       | ?                                                         | ?                                               | +                                        | +                                    | ?          |
| Järnefelt (2019)          | ?                                           | ?                                       | +                                                         | +                                               | +                                        | +                                    | +          |
| Kaku (2012)               | +                                           | +                                       | ?                                                         | +                                               | +                                        | +                                    | ?          |
| Marino (2016)             | ?                                           | ?                                       | ?                                                         | ?                                               | +                                        | +                                    | +          |
| Michalidis (2019)         | +                                           | +                                       | +                                                         | +                                               | +                                        | +                                    | ?          |
| Nishinoue (2012)          | +                                           | +                                       | +                                                         | ?                                               | +                                        | +                                    | +          |
| Olson (2015)              | ?                                           | ?                                       | +                                                         | +                                               | +                                        | +                                    | +          |
| Persson-Asplund (2017)    | +                                           | +                                       | ?                                                         | +                                               | +                                        | +                                    | ?          |
| Querstret (2017)          | +                                           | +                                       | ?                                                         | +                                               | +                                        | +                                    | ?          |
| Sadeghnia (2008)          | +                                           | +                                       | +                                                         | ?                                               | +                                        | +                                    | ?          |
| Schiller (2018)           | +                                           | +                                       | +                                                         | ?                                               | +                                        | +                                    | +          |
| Suzuki (2008)             | ?                                           | ?                                       | ?                                                         | +                                               | +                                        | ?                                    | ?          |
| Thlart (2015)             | +                                           | +                                       | ?                                                         | ?                                               | +                                        | +                                    | +          |
| Yamamoto (2016)           | +                                           | +                                       | +                                                         | +                                               | +                                        | +                                    | ?          |

**Figure S3.** Risk of bias summary: review authors' judgements about each risk of bias item for each included study.
